# Supplementary material for: Fiber enhanced Raman spectroscopic analysis as a novel method for diagnosis and monitoring of diseases related to hyperbilirubinemia and hyperbiliverdinemia
Source: Royal Society of Chemistry journal article supplement (doi:10.1039/c6an01670g), 2016-01-01
Supplement: c6an01670g1.pdf [file c6an01670g1.pdf]

## Supplementary Material

### Fiber enhanced Raman spectroscopic analysis as a novel method for diagnosis and monitoring of diseases related to hyperbilirubinemia and hyperbiliverdinemia

Di Yan<sup>1</sup>, Christian Domes<sup>1</sup>, Robert Domes<sup>1</sup>, Timea Frosch<sup>1</sup>, Jürgen Popp<sup>1,3,4</sup>, Mathias W. Pletz<sup>2</sup>, Torsten Frosch<sup>1,3,4,\*</sup>

<sup>1</sup>Leibniz Institute of Photonic Technology, Jena, Germany

<sup>2</sup>University Hospital, Center for Infectious Diseases and Infection Control, Jena, Germany

<sup>3</sup>Friedrich Schiller University, Institute for Physical Chemistry, Jena, Germany

<sup>4</sup>Friedrich Schiller University, Abbe Centre of Photonics, Jena, Germany

\*corresponding author: [torsten.frosch@uni-jena.de](mailto:torsten.frosch@uni-jena.de), [torsten.frosch@gmx.de](mailto:torsten.frosch@gmx.de)

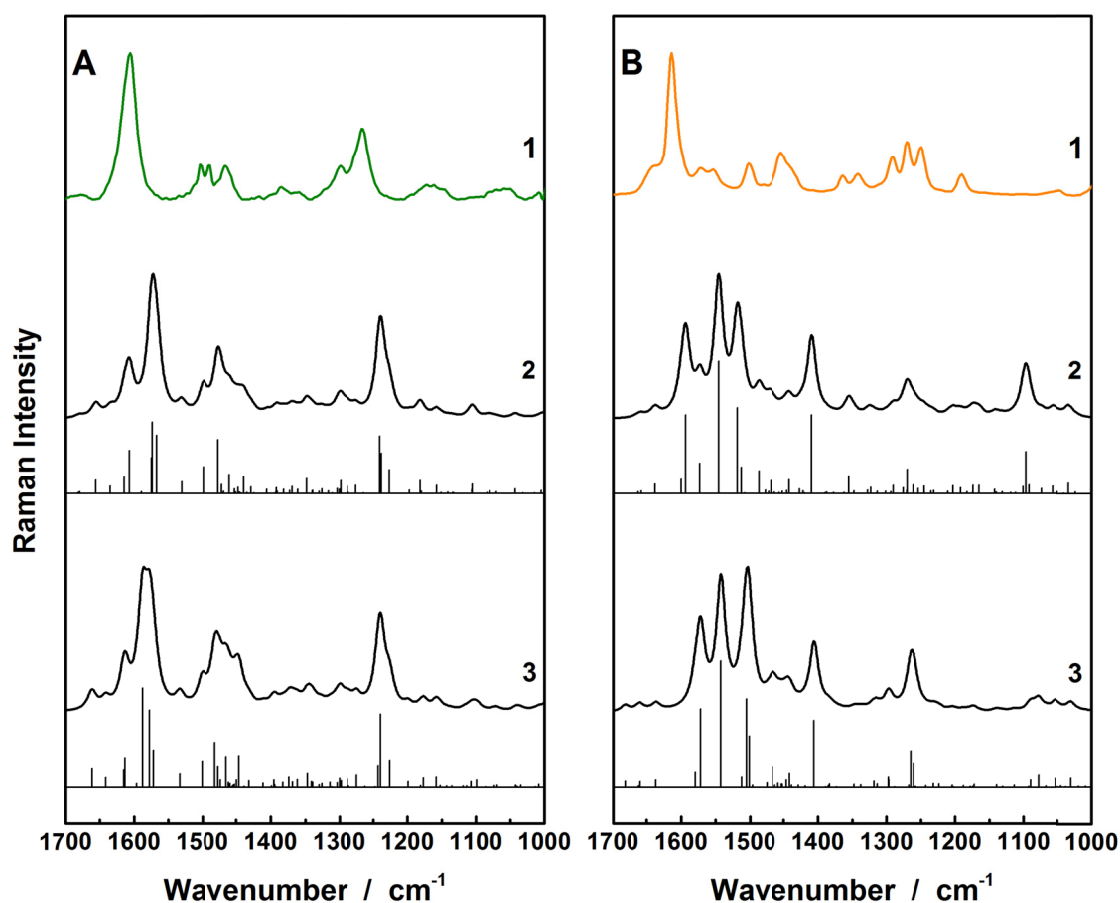

**Figure S1**

Comparison of the experimental FT-Raman spectra ( $\lambda_{\text{exc.}} = 1064 \text{ nm}$ ) of bilirubin (**A1**) and biliverdin (**B1**) with the calculated Raman spectra (B3LYP/cc-pVTZ) of bilirubin (in water (PCM): **A2** and in gas phase: **A3**) and biliverdin (in water (PCM): **B2** and in gas phase: **B3**). The scaling factors for A were 0.9762 and 0.9809 and for B were 0.9794 and 0.9792 for the gas phase and the PCM calculation, respectively.

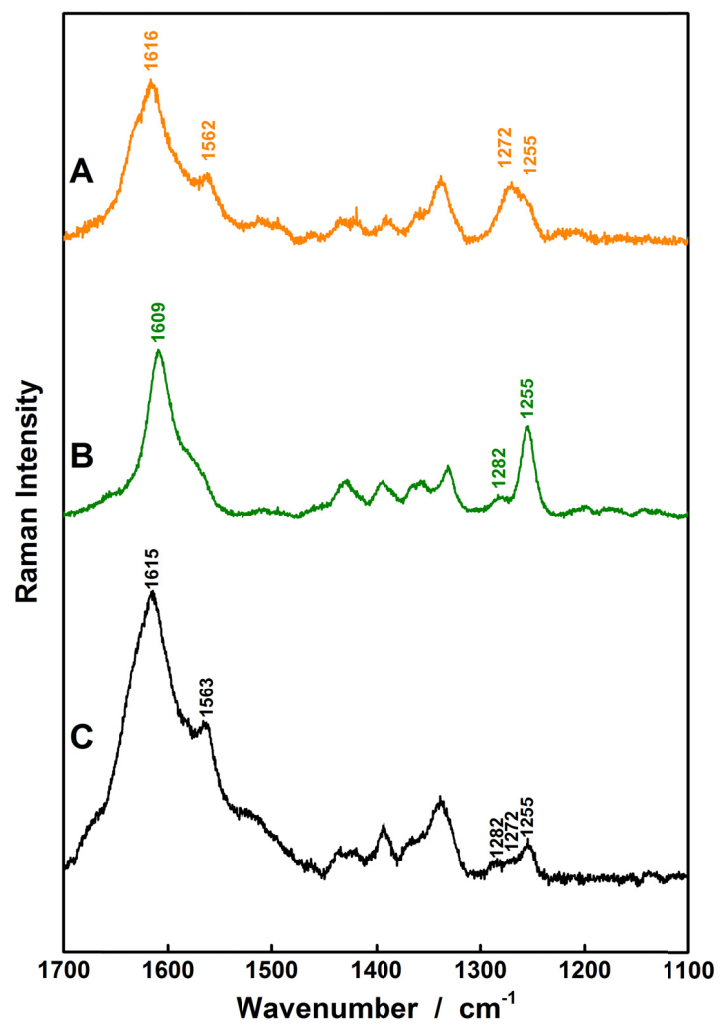

**Figure S2**

Raman spectra of 100 μM bilirubin (A), 1 μM biliverdin (B), and their mixture (C) with  $\lambda_{\text{exc.}} = 364$  nm.
